# Supplementary material for: Effect on Treatment Adherence of Distributing Essential Medicines at No Charge: The CLEAN Meds Randomized Clinical Trial
Source: PubMed Central journal article supplement (PMC6784757; doi:10.1001/jamainternmed.2019.4472), 2019-10-07
Supplement: jamainternmed-180-27-s003.pdf [file jamainternmed-180-27-s003.pdf]

## Data Sharing Statement

Persaud. Effect on Treatment Adherence of Distributing Essential Medicines at No Charge. *JAMA Intern Med*. Published October 07, 2019. 10.1001/jamainternmed.2019.4472

### Data

**Data available:** Yes

**Data types:** Deidentified participant data, Data dictionary

**How to access data:** [Nav.persaud@utoronto.ca](mailto:Nav.persaud@utoronto.ca)

**When available:** beginning date: 12-31-2019

### Supporting Documents

**Document types:** None

### Additional Information

**Who can access the data:** No restrictions.

**Types of analyses:** For any non-commercial purpose.

**Mechanisms of data availability:** Signed data access agreement.
